# Supplementary figures and images for: Soil Geochemical Properties Influencing the Diversity of Bacteria and Archaea in Soils of the Kitezh Lake Area, Antarctica
Source: MDPI journal article supplement (doi:10.3390/biology11121855), 2022-12-19

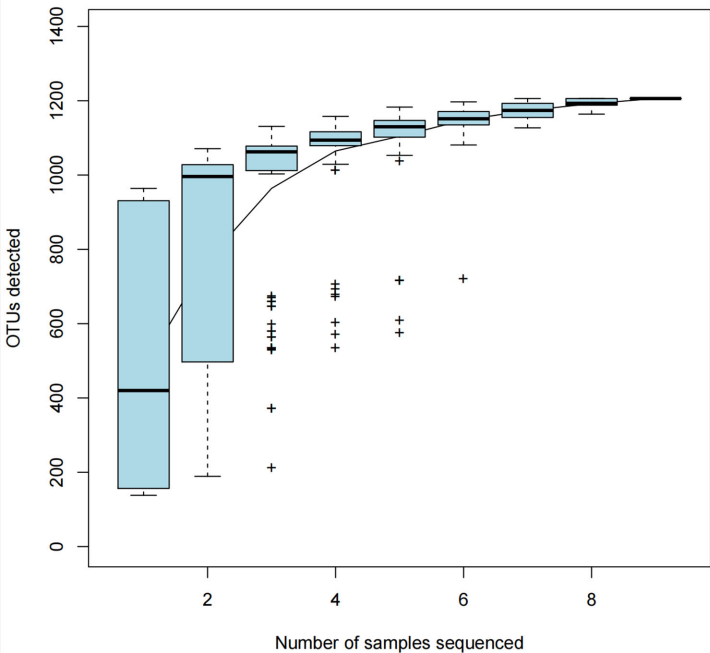

Supplement: s1 [file s1]

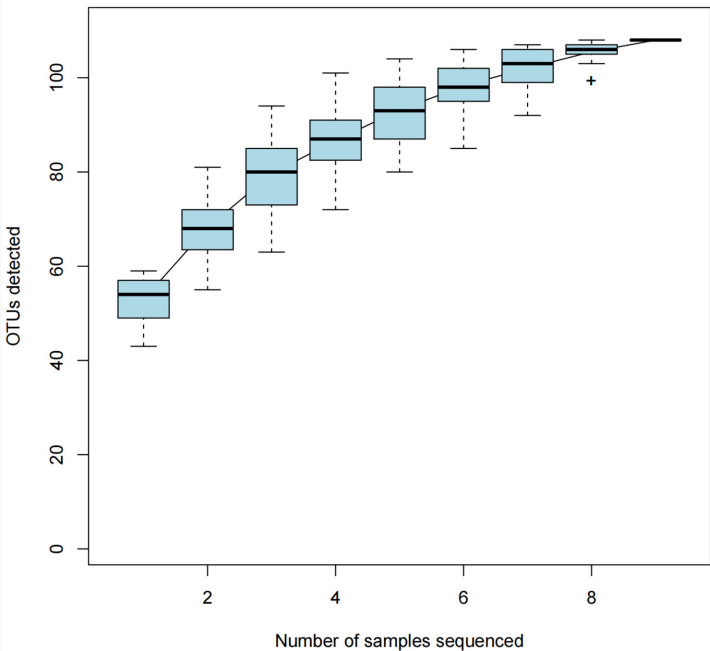

Supplement: s1 [file s1]

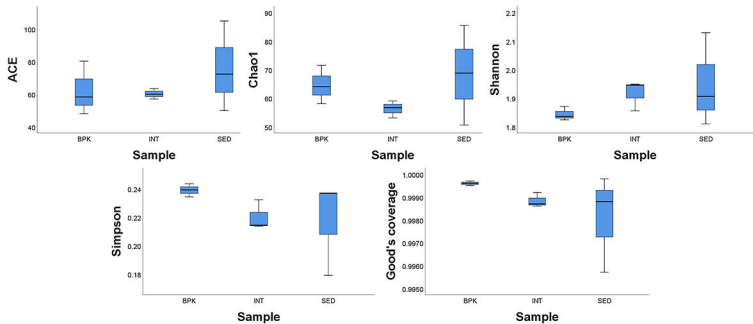

Supplement: s1 [file s1]

ACE

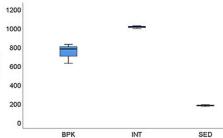

Sample

Chao1

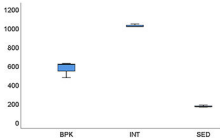

Sample

Shannon

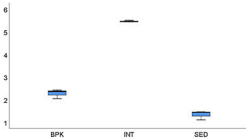

Sample

Simpson

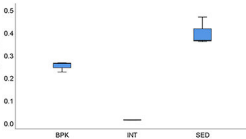

Sample

Good's coverage

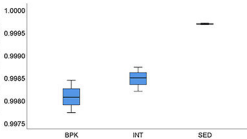

Sample

Supplement: s1 [file s1]
